# Supplementary material for: Highly Porous Expanded Graphite: Thermal Shock vs. Programmable Heating
Source: MDPI journal article supplement (doi:10.3390/ma14247687), 2021-12-13
Supplement: s1 [file s1]

## Article

# Highly Porous Expanded Graphite: Thermal Shock vs. Programmable Heating

Alexander G. Bannov <sup>1,\*</sup>, Arina V. Ukhina <sup>2</sup>, Evgenii A. Maksimovskii <sup>3</sup>, Igor Yu. Prosanov <sup>2</sup>, Artyom A. Shestakov <sup>1</sup>, Nikita I. Lapekin <sup>1</sup>, Nikita S. Lazarenko <sup>1</sup>, Pavel B. Kurmashov <sup>1</sup> and Maksim V. Popov <sup>1,4</sup>

<sup>1</sup> Department of Chemistry and Chemical Engineering, Faculty of Mechanical Engineering, Novosibirsk State Technical University, 630092 Novosibirsk, Russia; a.shestakov25@mail.ru (A.A.S.); lapekin21@mail.ru (N.I.L.); 9139278003@mail.ru (N.S.L.);

kurmaschov@gmail.com (P.B.K.); popovmaxvik@gmail.com (M.V.P.)

<sup>2</sup> Institute of Chemistry of Solid State and Mechanochemistry, Siberian Branch, Russian Academy of Sciences, 630092 Novosibirsk, Russia; auhina181@gmail.com (A.V.U.); prosanov@mail.ru (I.Y.P.)

<sup>3</sup> Institute of Inorganic Chemistry, Siberian Branch, Russian Academy of Sciences, 630090 Novosibirsk, Russia; eugene@niic.nsc.ru

<sup>4</sup> N.D. Zelinsky Institute of Organic Chemistry, Russian Academy of Sciences, 119991 Moscow, Russia  
\* Correspondence: bannov.alexander@gmail.com

Figure S1 shows the Raman spectrum of the IG sample. The I(D)/I(G) ratio was 0.07.

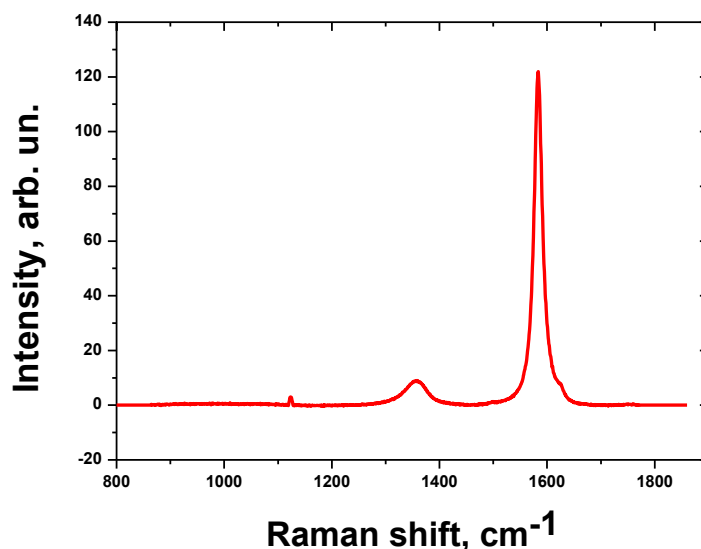

Figure S1. Raman spectrum of the intercalated graphite.

Figure S2 shows the isotherms of adsorption of expanded graphites.

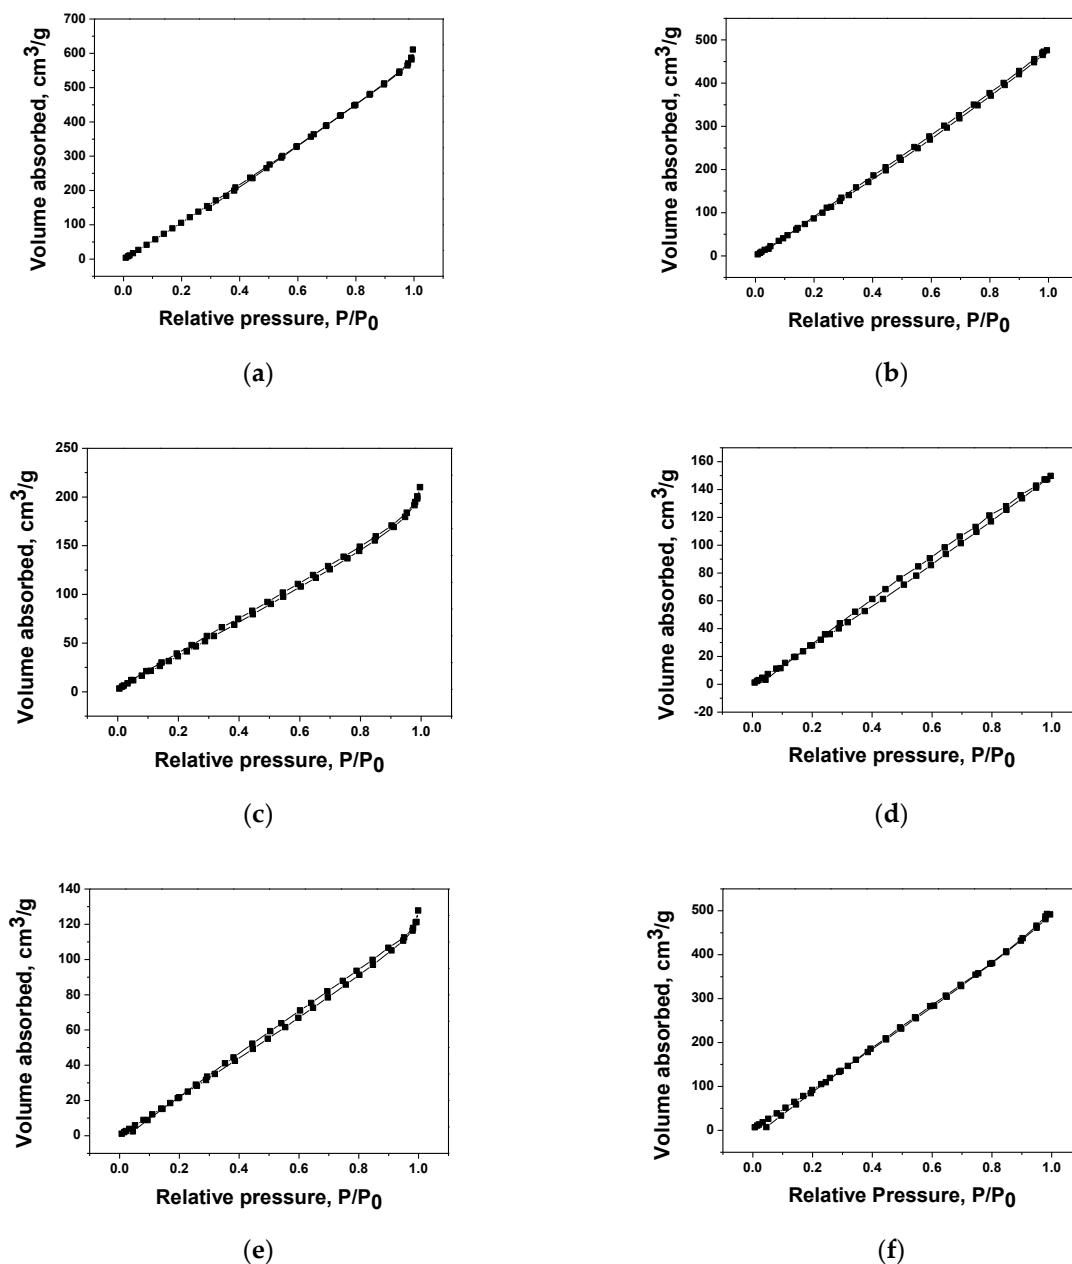

**Figure S2.** Isotherms of adsorption of expanded graphites: TEG1-400 (a), TEG1-500 (b), TEG1-600 (c), TEG1-700 (d), TEG2-400 (e), TEG2-1000 (f).
